# Supplementary figures and images for: Bedrock radioactivity influences the rate and spectrum of mutation
Source: eLife journal article supplement (doi:10.7554/elife.56830), 2020-11-30

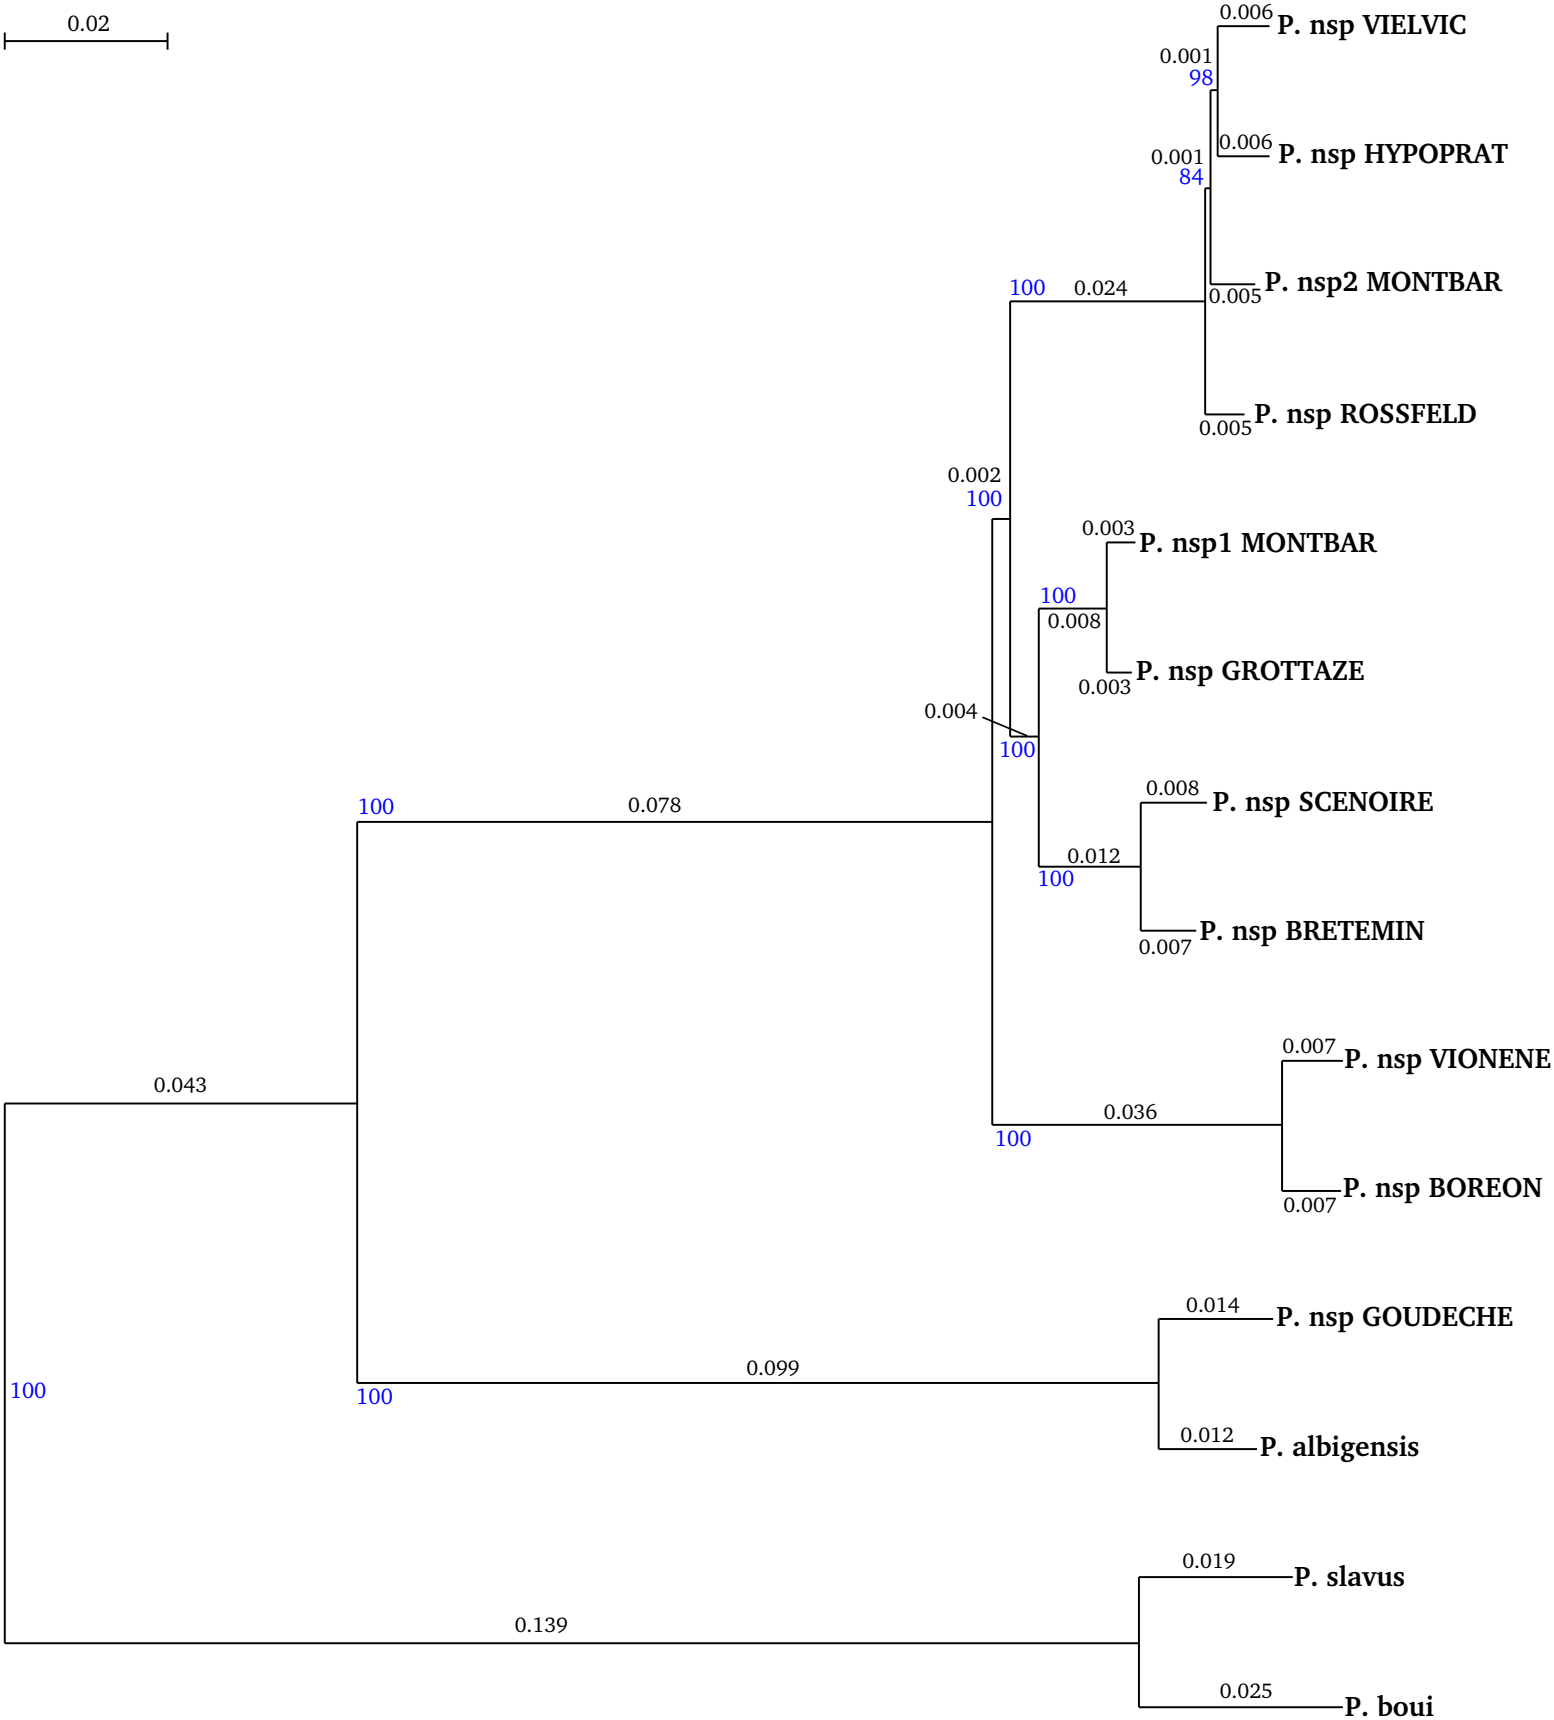

Supplement: supp [file elife_poa_e56830_Figure_1_figure_supplement_1.pdf › elife_poa_e56830_Figure_1_figure_supplement_1.pdf]

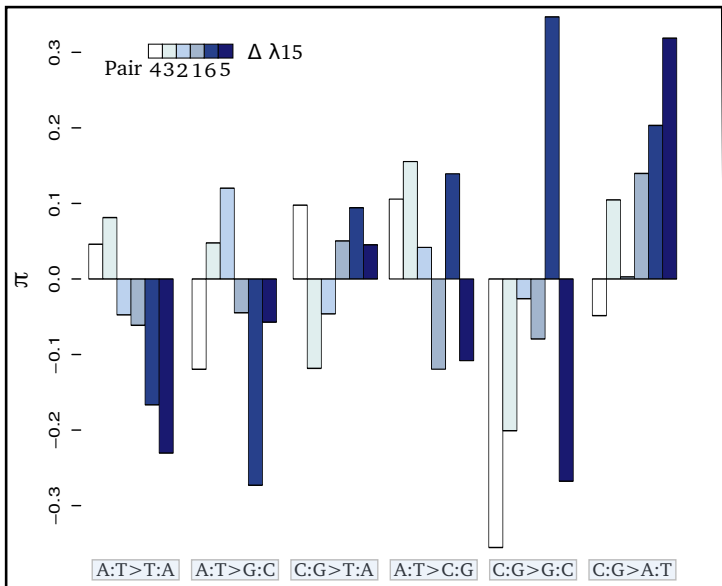

Supplement: supp [file elife_poa_e56830_Figure_3_figure_supplement_1.pdf › elife_poa_e56830_Figure_3_figure_supplement_1.pdf]
